# Supplementary material for: Silver nanoparticles selectively treat triple‐negative breast cancer cells without affecting non‐malignant breast epithelial cells in vitro and in vivo
Source: PubMed Central journal article supplement (PMC6996381; doi:10.1096/fba.2019-00021), 2019-09-30
Supplement: FBA2-1-639-s001.pdf [file FBA2-1-639-s001.pdf]

## **SUPPLEMENTARY FIGURES**

**Supplementary figure S1.** Physicochemical characterization and cytotoxicity of PVP stabilized, triangular silver nanoplates.

**Supplementary Figure S2.** Physicochemical characterization and cytotoxicity of PVP stabilized, gold nanoparticles.

**Supplementary Figure S3.** Physicochemical characterization and cytotoxicity of chitosan-coated, triangular silver nanoplates.

**Supplementary Figure S4.** Physicochemical characterization and cytotoxicity of silica-shelled, triangular silver nanoplates.

**Supplementary Figure S5.** Evaluation of the effects storage and buffers on stability and cytotoxicity of AgNPs.

**Supplementary Figure S6.** TEM images of AgNPs in iMEC cells.

**Supplementary Figure S7.** TEM images of AgNPs in SUM159 cells.

**Supplementary Figure S9.** Cytotoxicity of AgNPs in S1 cell monolayer.

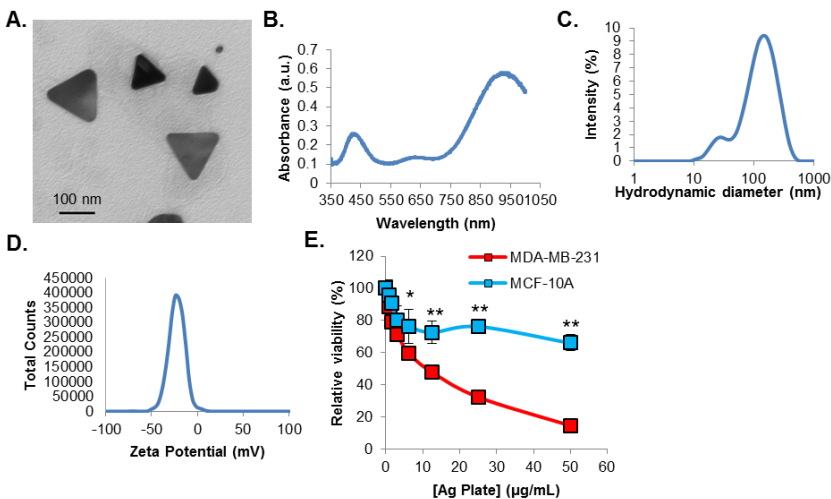

**Supplementary Figure S1.** Physicochemical characterization and cytotoxicity of PVP stabilized triangular silver nanoparticles. (A) Transmission electron micrograph showing nanoparticle structure. (B) UV/vis spectroscopy showing plasmon resonance. (C) DLS evaluation of nanoparticle hydrodynamic diameter in water. (D) DLS evaluation of nanoparticle  $\zeta$ -potential in water (pH 6.5). (E) Evaluation of nanoparticle cytotoxicity in MDA-MB-231 and MCF-10A cells after 48 h exposure. Cell viability was assessed by MTT assay. Data were obtained from 6 technical replicates per cell line and are representative of duplicate independent experiments. Statistical analysis was performed by two-way ANOVA and post-hoc Tukey Test. Significant differences are indicated (\* $p < 0.5$ ; \*\* $p < 0.01$ ).

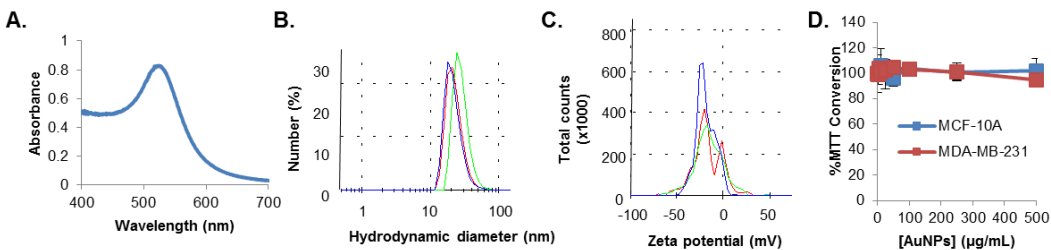

**Supplementary Figure S2.** Physicochemical characterization and cytotoxicity of PVP stabilized, spherical gold nanoparticles (AuNPs). (A) UV/vis spectroscopy showing plasmon resonance. (B) DLS evaluation of nanoparticle hydrodynamic diameter in water (shown in triplicate). (C) DLS evaluation of nanoparticle  $\zeta$ -potential in water (pH 6.5; shown in triplicate). (D) Evaluation of nanoparticle cytotoxicity in MDA-MB-231 and MCF-10A cells after 48 h exposure. Cell viability was assessed by MTT assay. Data were obtained from 6 technical replicates per cell line and are representative of duplicate independent experiments. Statistical analysis was performed by two-way ANOVA and post-hoc Tukey Test. No significant differences were observed ( $p > 0.5$ ).

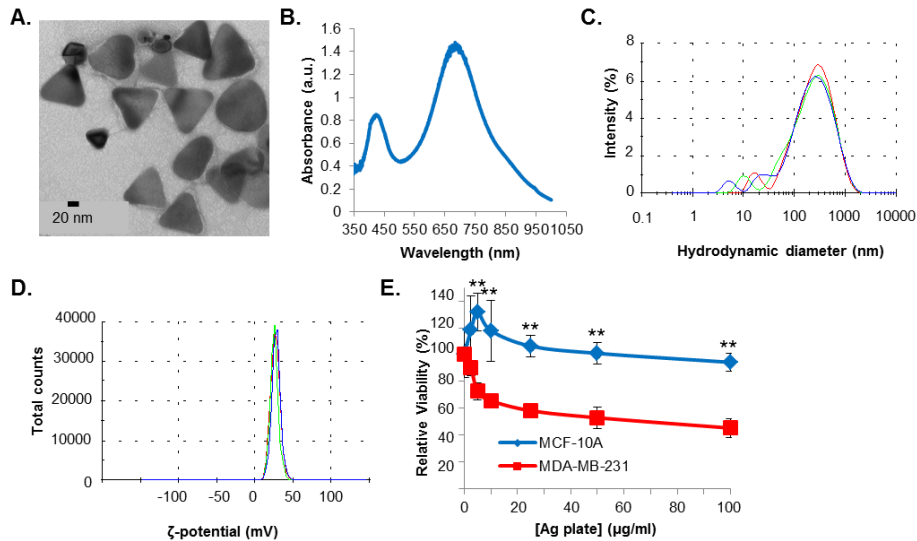

**Supplementary Figure S3.** *Physicochemical characterization and cytotoxicity of chitosan stabilized, triangular silver nanoplates.* (A) Transmission electron micrograph showing nanoparticle structure. (B) UV/vis spectroscopy showing plasmon resonance. (C) DLS evaluation of nanoparticle hydrodynamic diameter in water. (D) DLS evaluation of nanoparticle  $\zeta$ -potential in water (pH 6.5). (E) Evaluation of nanoparticle cytotoxicity in MDA-MB-231 and MCF-10A cells after 48 h exposure. Cell viability was assessed by MTT assay. Data were obtained from 6 technical replicates per cell line and are representative of duplicate independent experiments. Statistical analysis was performed by two-way ANOVA and post-hoc Tukey Test. Significant differences are indicated  $**p < 0.01$ .

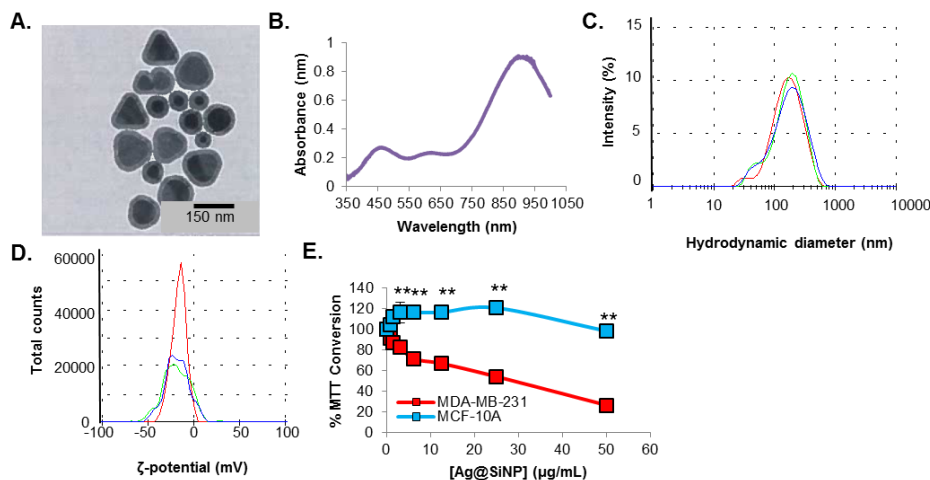

**Supplementary Figure S4.** *Physicochemical characterization and cytotoxicity of PVP stabilized, triangular silver nanoplates.* (A) Transmission electron micrograph showing nanoparticle structure. (B) UV/vis spectroscopy showing plasmon resonance. (C) DLS evaluation of nanoparticle hydrodynamic diameter in water. (D) DLS evaluation of nanoparticle  $\zeta$ -potential in water (pH 6.5). (E) Evaluation of nanoparticle cytotoxicity in MDA-MB-231 and MCF-10A cells after 48 h exposure. Cell viability was assessed by MTT assay. Data were obtained from 6 technical replicates per cell line and are representative of duplicate independent experiments. Statistical analysis was performed by two-way ANOVA and post-hoc Tukey Test. Significant differences are indicated  $**p < 0.01$ .

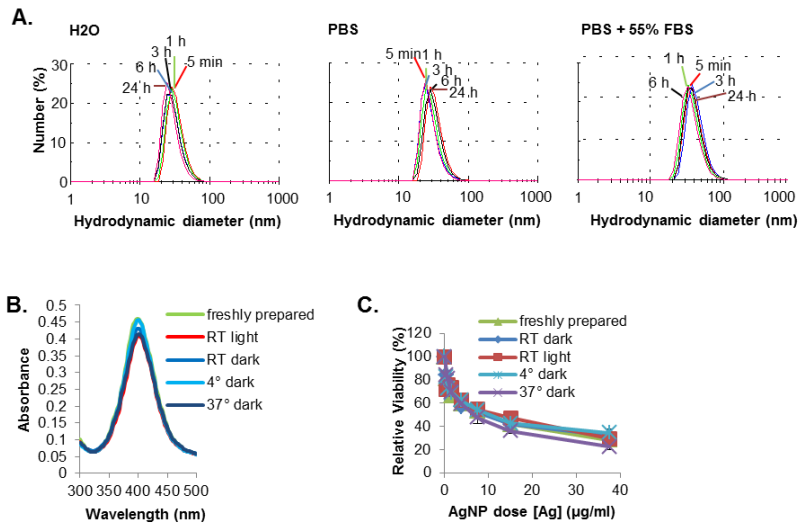

**Supplementary Figure S5.** Evaluation of the effects storage and buffers on stability and cytotoxicity of AgNPs. (A) The hydrodynamic diameter of PVP stabilized, 25 nm AgNPs was measured over time (5 min, 1 h, 3 h, 6 h, 24 h) in water, PBS, and PBS supplemented with 55% FBS. (B) The plasmon resonance of 25 nm AgNPs in PBS was evaluated for freshly hydrated particles, or after storage at 4 °C, room temperature (RT), or 37 °C in the dark or light for 1 week. (C) MDA-MB-231 cells were exposed to 25 nm AgNPs stored as in (B) and cell viability after 48 h exposure was assessed by MTT assay. Data were obtained from 6 technical replicates and are representative of duplicate independent experiments. Statistical analysis was performed by two-way ANOVA and no significant differences ( $p > 0.05$ ) were detected.

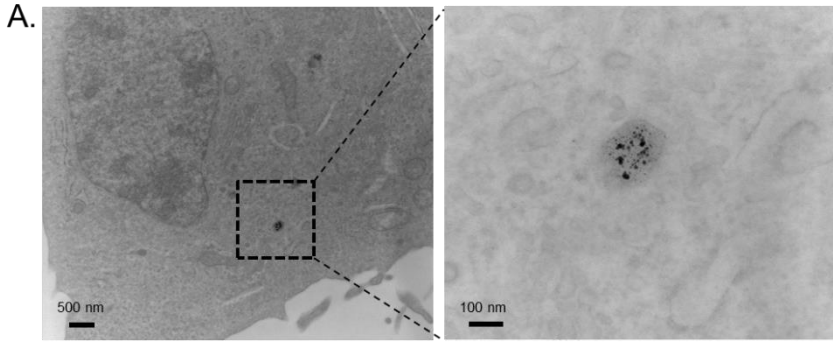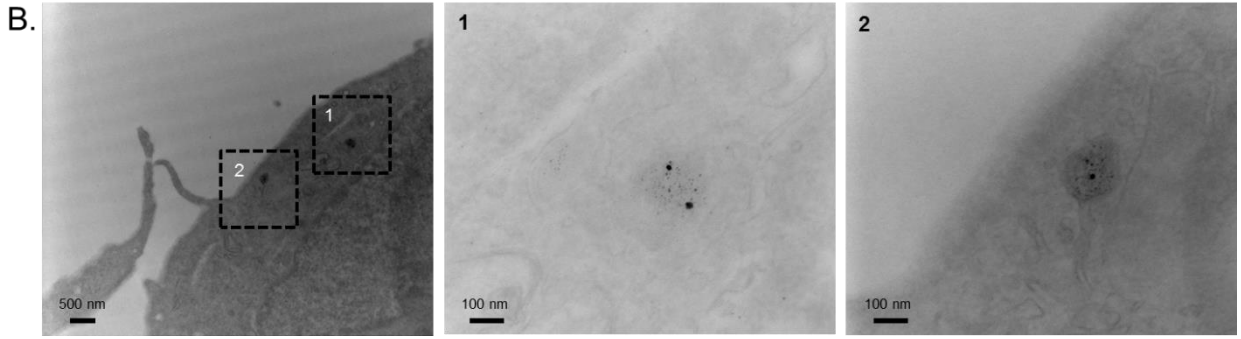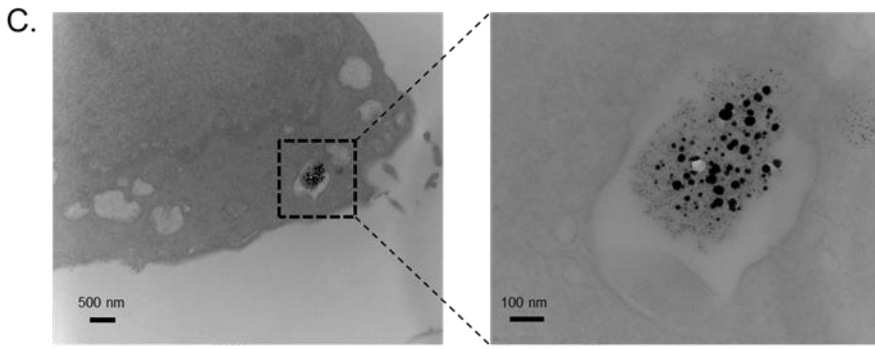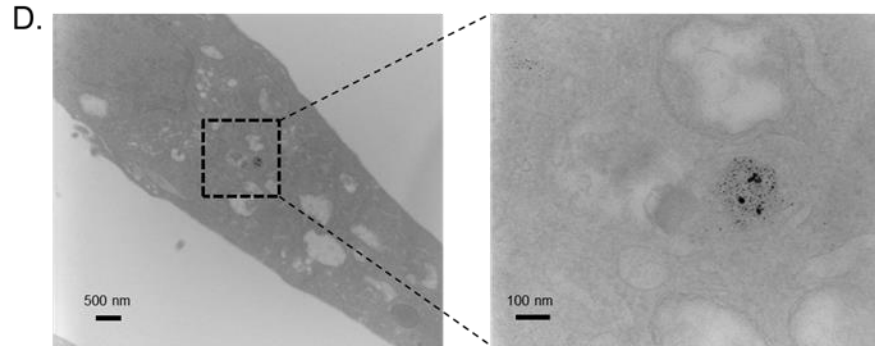

**Supplementary Figure S6.** *Imaging the uptake and trafficking of AgNPs in iMEC.* (A, B) Electron micrographs show intact AgNPs in endosomes in iMEC cells after a 1 hour pulse at 11000X (left panel) or at 68000X (right panels) for the indicated regions. (C,D) AgNPs remain intact at the 6 h time point (1 h pulse and 5 hour chase) in cells at 11000X (left panel) or at 68000X (right panels) for the indicated regions.

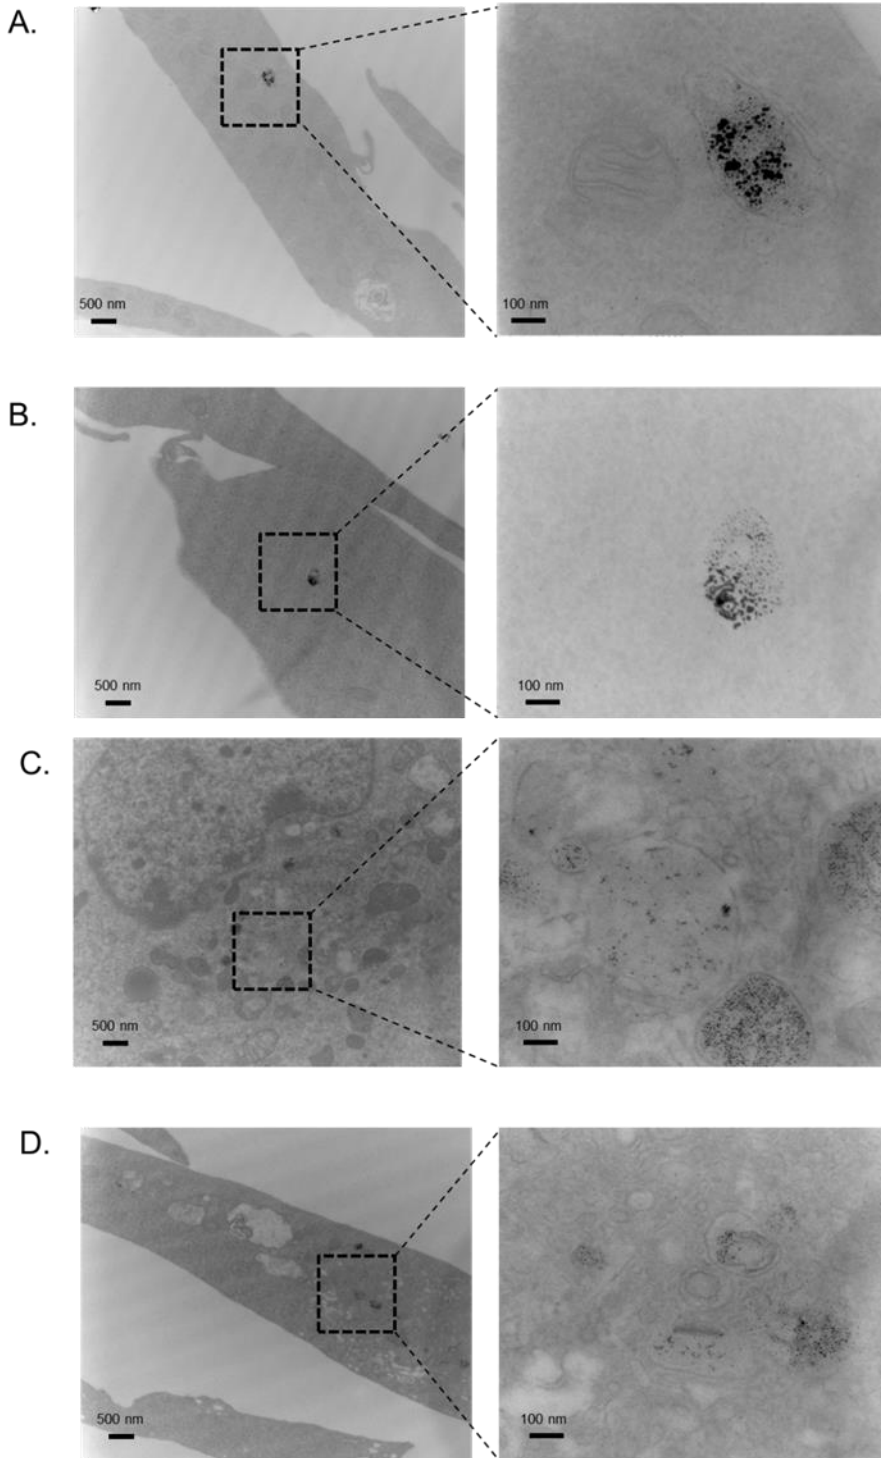

**Supplementary Figure S7** *Imaging the uptake and trafficking of AgNPs in SUM159 cells* (A, B) Electron micrographs show AgNPs beginning to degrade in endosomes in SUM159 cells after a 1 hour pulse at 11000X (left panel) or at 68000X (right panels) for the indicated regions. (C,D) AgNPs are highly degraded at the 6 h time point (1 h pulse and 5 hour chase) in cells at 11000X (left panel) or at 68000X (right panels) for the indicated regions.

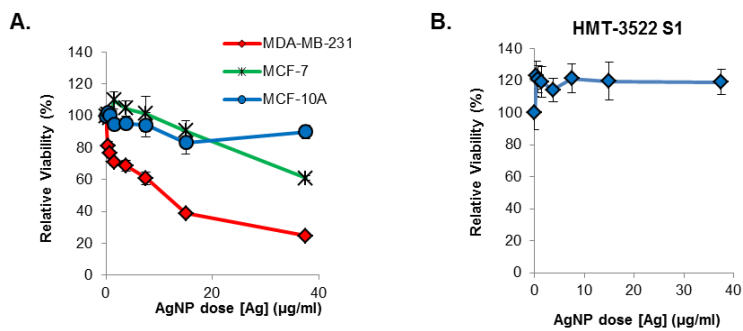

**Supplementary Figure S8.** Cytotoxicity of AgNPs in cell monolayers. (A) MDA-MB-231, MCF-7, and MCF-10A cells, or (B) HMT-3522 S1 normal mammary epithelial cells were exposed to PVP stabilized, 25 nm AgNPs for 48 h and viability was assessed by MTT assay. Data were obtained from 6 technical replicates per cell line and are representative of duplicate independent experiments.
